# Supplementary material for: Metagenomic Analysis of RNA Fraction Reveals the Diversity of Swine Oral Virome on South African Backyard Swine Farms in the uMgungundlovu District of KwaZulu-Natal Province
Source: MDPI journal article supplement (doi:10.3390/pathogens11080927), 2022-08-17
Supplement: s1 [file s1]

**Supplementary Table S1:** Overview of virus genome sequences generated from South African backyard swine saliva samples

| Virus ID<br>(Backyard Farm<br>ID)                    | Genome characterization |                     |                     |                        |                                                                                                        |                                                                                                                                                                                   |                                                                                                                        |
|------------------------------------------------------|-------------------------|---------------------|---------------------|------------------------|--------------------------------------------------------------------------------------------------------|-----------------------------------------------------------------------------------------------------------------------------------------------------------------------------------|------------------------------------------------------------------------------------------------------------------------|
|                                                      | #Contigs                | Percent<br>coverage | Reference<br>genome | Percent<br>identity    | #Nucleotides (annotation of genome<br>segments)                                                        | Insertion (amino acid<br>position)                                                                                                                                                | Deletion (amino acid<br>position)                                                                                      |
| <b>Family <i>Astroviridae</i></b>                    |                         |                     |                     |                        |                                                                                                        |                                                                                                                                                                                   |                                                                                                                        |
| Porcine<br>astrovirus type-<br>2- contig 1<br>(BSF1) | 1                       | 99.3                | NC023674            | nt (70.1)<br>aa (75.6) | 6364 nt (complete coding regions for<br>ORF1ab, ORF1a, ORF2)                                           | <b>ORF1a:</b> K (396)<br><b>ORF2:</b> Q (8), S (286), I (315),<br>N (366), S (401), Y (422), HG<br>(482), GNGY (539), DVVT<br>(626), E (639), PPPSEE (653),<br>EASNFYDFDSDL (665) | <b>ORF1a:</b> I (626)<br><b>ORF2:</b> S (36), R (42), A (43),<br>G (435), L (489)                                      |
| Porcine<br>astrovirus type-<br>2- contig 2<br>(BSF1) | 1                       | 65.4                | NC023674            | nt (80.8)<br>aa (88.9) | 4130 nt (complete coding regions for<br>ORF 1ab and ORF 1a, partial coding<br>region for ORF2)         | None                                                                                                                                                                              | <b>ORF1ab:</b> L (1281), A (1282)                                                                                      |
| Porcine<br>astrovirus type-<br>2 (BSF2)              | 7                       | 82.1                | NC023674            | nt (79.1)<br>aa (85.9) | 5185 nt (complete coding region for<br>ORF1ab, partial coding regions for<br>ORF1a, ORF2)              | <b>ORF2:</b> V (535), ECS (540), VS<br>(629), PPPED (653), 665 (E),                                                                                                               | None                                                                                                                   |
| Porcine<br>astrovirus type-<br>4 (BSF2)              | 4                       | 96.2                | NC023675            | nt (80.9)<br>aa (84.0) | 6384 nt (complete coding regions for<br>ORF1ab and ORF1a, partial coding<br>region for ORF2)           | None                                                                                                                                                                              | <b>ORF1a:</b> T (603)                                                                                                  |
| Astrovirus wild<br>boar (BSF2)                       | 7                       | 92.7                | NC016896            | nt (81.5)<br>aa (81.5) | 6219 nt (complete coding regions for<br>ORF1ab and ORF1a, partial coding<br>region for ORF2)           | <b>ORF1ab:</b> LV (226)<br><b>ORF2:</b> E (756)                                                                                                                                   | <b>ORF1ab:</b> H (214), R (233), R<br>(234) G (235), G (236)<br><b>ORF1a:</b> T (398)<br><b>ORF2:</b> G (718), A (721) |
| Dromedary<br>astrovirus<br>(BSF2)                    | 2                       | 89.7                | NC027711            | nt (74.0)<br>aa (80.4) | 5674 nt (complete coding regions for<br>ORF1a and ORFX, partial coding<br>regions for ORF1ab and ORF2) | <b>ORF2:</b> P (9), T (401), Q (491),<br>M (505), HNINN (542), E<br>(554), GT (625), INA (638),<br>PEEET (671)                                                                    | <b>ORF2:</b> T (426)                                                                                                   |
| Porcine<br>astrovirus type-<br>4 (BSF3)              | 4                       | 77.0                | NC023675            | nt (85.2)<br>aa (87.3) | 5111 nt (complete coding regions for<br>ORF1ab and ORF1a, partial coding<br>region for ORF2)           | None                                                                                                                                                                              | None                                                                                                                   |
| Porcine<br>astrovirus type-<br>2 (BSF3)              | 8                       | 70.0                | NC023674            | nt (80.7)<br>aa (85.5) | 4421 nt (complete coding region for<br>ORF1ab, partial coding regions for<br>ORF1a, ORF2)              | ORF2: NNYS (540)                                                                                                                                                                  | None                                                                                                                   |
| Astrovirus wild<br>boar (BSF3)                       | 4                       | 87.0                | NC016896            | nt (83.5)<br>aa (84.5) | 5833 nt (complete coding regions for<br>ORF1ab and ORF1a, partial coding<br>region for ORF2)           | <b>ORF1ab:</b> LM (226),                                                                                                                                                          | <b>ORF1ab:</b> R (233), R (234) G<br>(235), G (236)<br><b>ORF1a:</b> T (398)                                           |

|                                   |   |      |          |                        |                                                                                                                                            |                                                                                             |                                                                                                                                                                                                                                                        |
|-----------------------------------|---|------|----------|------------------------|--------------------------------------------------------------------------------------------------------------------------------------------|---------------------------------------------------------------------------------------------|--------------------------------------------------------------------------------------------------------------------------------------------------------------------------------------------------------------------------------------------------------|
|                                   |   |      |          |                        |                                                                                                                                            |                                                                                             | <b>ORF2: L (708)</b>                                                                                                                                                                                                                                   |
| Dromedary<br>astrovirus<br>(BSF3) | 2 | 47.1 | NC027711 | nt (79.4)<br>aa (85.7) | 2979 nt (complete coding region for<br>ORF1a, partial coding region for<br>ORF1ab)                                                         | None                                                                                        | None                                                                                                                                                                                                                                                   |
| Bovine<br>astrovirus<br>(BSF2)    | 1 | 29.3 | NC024297 | nt (62.2)<br>aa (58.8) | 1829 nt (partial coding sequence for<br>capsid protein precursor)                                                                          | <b>Capsid protein:</b> S (304), T<br>(422), ADTNH (437), RADG<br>(655), SFGC (665), L (679) | <b>Capsid protein:</b> P (387)                                                                                                                                                                                                                         |
| Mamastrovirus<br>2 (BSF1)         | 1 | 54.1 | NC034974 | nt (75.1)<br>aa (74.5) | 3401 nt (complete coding sequence for<br>capsid protein, partial coding<br>sequence for RdRp)                                              | <b>Capsid protein:</b> N (365), K<br>(454), S (515), TNSS (547), NT<br>(601)                | <b>Capsid protein:</b> S (10), R<br>(42), T (43), P (319), A (342),<br>V (374), Q (375), T (408), P<br>(409), P (410), G (411), N<br>(449), G (458), L (564), Y<br>(565), G (619), L (620), T<br>(642), T (643), L (644), R<br>(645), V (646), G (647) |
| Mamastrovirus<br>2 (BSF2)         | 4 | 77.5 | NC034974 | nt (80.4)<br>aa (84.1) | 4920 nt (complete coding sequence for<br>RdRp, partial coding sequence for<br>capsid and nonstructural proteins)                           | None                                                                                        | <b>Capsid protein:</b> T (43)                                                                                                                                                                                                                          |
| Mamastrovirus<br>3 (BSF2)         | 1 | 97.9 | NC025379 | nt (84.6)<br>aa (91.4) | 6562 nt (complete coding sequence)                                                                                                         | <b>Capsid protein:</b> D (643)                                                              | <b>Capsid protein:</b> A (662), S<br>(663)                                                                                                                                                                                                             |
| Porcine<br>bastrovirus<br>(BSF3)  | 1 | 97.4 | NC032423 | nt (81.6)<br>aa (91.8) | 5848 nt (complete coding sequence)                                                                                                         | <b>Structural polyprotein:</b><br>KQWN (464)                                                | <b>Structural polyprotein:</b> I<br>(433), P (434), S (643), A<br>(651), G (652), G (653)                                                                                                                                                              |
| <b>Family Hepeviridae</b>         |   |      |          |                        |                                                                                                                                            |                                                                                             |                                                                                                                                                                                                                                                        |
| Hepatitis E<br>virus (BSF3)       | 1 | 97.7 | NC001434 | nt (74.3)<br>aa (84.8) | 7040 nt (complete coding sequence for<br>hypothetical protein and capsid<br>protein, partial coding sequence for<br>nonstructural protein) | <b>Nonstructural protein:</b> IWV<br>(739), VDVV (748), PSLA<br>(759)                       | <b>Nonstructural protein:</b> A<br>(775)<br><b>Hypothetical protein:</b> R (4)                                                                                                                                                                         |
| <b>Family Reoviridae</b>          |   |      |          |                        |                                                                                                                                            |                                                                                             |                                                                                                                                                                                                                                                        |
| Rotavirus A<br>(BSF2)             | 3 | 96.1 | NC011507 | nt (78.9)<br>aa (90.0) | Segment 1 (VP1): 3173 nt- near<br>complete coding sequence                                                                                 | None                                                                                        | None                                                                                                                                                                                                                                                   |
|                                   | 2 | 78.5 | NC011506 | nt (80.3)<br>aa (91.4) | Segment 2 (VP2): 2114 nt- partial<br>coding sequence                                                                                       | DVTMES (29), KE (340),                                                                      | None                                                                                                                                                                                                                                                   |
|                                   | 1 | 98.5 | NC011508 | nt (76.4)<br>aa (83.5) | Segment 3 (VP3): 2552 nt- complete<br>coding sequence                                                                                      | None                                                                                        | None                                                                                                                                                                                                                                                   |
|                                   | 3 | 62.7 | NC011510 | nt (73.5)<br>aa (79.8) | Segment 4 (Outer capsid spike): 1482<br>nt- partial coding sequence                                                                        | None                                                                                        | S (603), S (604), V (605)                                                                                                                                                                                                                              |

|                       |   |      |          |                        |                                                                                                                        |          |                                                                                                                                  |
|-----------------------|---|------|----------|------------------------|------------------------------------------------------------------------------------------------------------------------|----------|----------------------------------------------------------------------------------------------------------------------------------|
|                       | 1 | 37.3 | NC011500 | nt (64.4)<br>aa (52.0) | Segment 5 (NSP1): 602 nt- partial<br>coding sequence                                                                   | None     | E (152)                                                                                                                          |
|                       | 2 | 75.1 | NC011509 | nt (79.9)<br>aa (90.9) | Segment 6 (VP6): 1018 nt- partial<br>coding sequence                                                                   | None     | None                                                                                                                             |
|                       | 1 | 95.5 | NC011501 | nt (75.0)<br>aa (77.9) | Segment 7 (NSP3): 1055 nt- near<br>complete coding sequence                                                            | None     | G (313), C (314)                                                                                                                 |
|                       | 1 | 93.5 | NC011502 | nt (79.1)<br>aa (86.5) | Segment 8 (NSP2): 990 nt- complete<br>coding sequence                                                                  | None     | None                                                                                                                             |
|                       | 1 | 96.5 | NC011503 | nt (78.7)<br>aa (85.9) | Segment 9 (VP7): 1024 nt- complete<br>coding sequence                                                                  | None     | Y (175)                                                                                                                          |
|                       | 1 | 64.6 | NC011504 | nt (78.4)<br>aa (81.4) | Segment 10 (NSP4): 485 nt- partial<br>coding sequence                                                                  | None     | None                                                                                                                             |
|                       | 1 | 88.2 | NC011505 | nt (88.9)<br>aa (90.9) | Segment 11 (NSP5 and NSP6): 588 nt-<br>complete coding sequence for NSP6,<br>near-complete coding sequence for<br>NSP5 | None     | NSP5: N (140)                                                                                                                    |
| Rotavirus C<br>(BSF2) | 2 | 38.6 | NC007547 | nt (85.9)<br>aa (93.4) | Segment 1 (VP1): 1277 nt- partial<br>coding sequence                                                                   | None     | None                                                                                                                             |
|                       | 2 | 19.8 | NC007546 | nt (85.8)<br>aa (95.9) | Segment 2 (VP2): 542 nt- partial<br>coding sequence                                                                    | None     | None                                                                                                                             |
|                       | 2 | 50.6 | NC007574 | nt (82.4)<br>aa (85.8) | Segment 4 (VP3): 1095 nt- partial<br>coding sequence                                                                   | None     | None                                                                                                                             |
|                       | 2 | 44.7 | NC007543 | nt (75.8)<br>aa (72.5) | Segment 6 (NSP3): 603 nt- partial<br>coding sequence                                                                   | None     | None                                                                                                                             |
|                       | 1 | 23.8 | NC007544 | nt (67.9)<br>aa (61.4) | Segment 7 (NSP1): 302 nt- partial<br>coding sequence                                                                   | None     | None                                                                                                                             |
|                       | 1 | 27.7 | NC007571 | nt (83.7)<br>aa (83.7) | Segment 8 (VP7): 294 nt- partial<br>coding sequence                                                                    | None     | None                                                                                                                             |
| Rotavirus C<br>(BSF3) | 1 | 99.1 | NC007547 | nt (85.1)<br>aa (90.6) | Segment 1 (VP1): 3279 nt- near<br>complete coding sequence                                                             | None     | None                                                                                                                             |
|                       | 2 | 79.3 | NC007546 | nt (82.1)<br>aa (90.9) | Segment 2 (VP2): 2170 nt- partial<br>coding sequence                                                                   | None     | None                                                                                                                             |
|                       | 2 | 82.4 | NC007572 | nt (71.7)<br>aa (71.1) | Segment 3 (VP4): 1882 nt- partial<br>coding sequence                                                                   | QY (142) | N (132), N (133), P (209), G<br>(210), I (211), N (212), S<br>(253), K (254), L (255), G<br>(256), D (257), S (390), S<br>(392), |

|                                                          |   |      |          |                        |                                                             |                  |                  |
|----------------------------------------------------------|---|------|----------|------------------------|-------------------------------------------------------------|------------------|------------------|
|                                                          | 1 | 97.1 | NC007574 | nt (81.8)<br>aa (85.6) | Segment 4 (VP3): 2104 nt- near<br>complete coding sequence  | None             | None             |
|                                                          | 2 | 69.0 | NC007570 | nt (83.7)<br>aa (90.4) | Segment 5 (VP6): 933 nt- partial<br>coding sequence         | None             | None             |
|                                                          | 1 | 69.4 | NC007543 | nt (78.5)<br>aa (80.8) | Segment 6 (NSP3): 937 nt- partial<br>coding sequence        | None             | None             |
|                                                          | 1 | 80.6 | NC007544 | nt (65.5)<br>aa (59.2) | Segment 7 (NSP1): 1023 nt- partial<br>coding sequence       | None             | None             |
|                                                          | 2 | 61.0 | NC007571 | nt (74.2)<br>aa (76.5) | Segment 8 (VP7): 648 nt- partial<br>coding sequence         | SSTL (244)       | None             |
|                                                          | 1 | 42.3 | NC007545 | nt (80.4)<br>aa (80.3) | Segment 9 (NSP2): 439 nt- partial<br>coding sequence        | None             | None             |
|                                                          | 1 | 85.1 | NC007569 | nt (74.1)<br>aa (67.8) | Segment 10 (NS26): 621 nt- partial<br>coding sequence       | None             | T (131), E (132) |
|                                                          | 1 | 70.5 | NC007573 | nt (65.7)<br>aa (56.9) | Segment 11 (NSP4): 432 nt- near<br>complete coding sequence | None             | None             |
| Human<br>rotavirus B<br>(BSF2)                           | 6 | 75.5 | NC021541 | nt (70.7)<br>aa (76.8) | Segment 1 (VP1): 2652 nt- partial<br>coding sequence        | None             | None             |
|                                                          | 3 | 61.5 | NC021545 | nt (73.1)<br>aa (79.9) | Segment 2 (VP2): 1752 nt- partial<br>coding sequence        | R (67)           | R (612)          |
|                                                          | 3 | 61.3 | NC021551 | nt (69.6)<br>aa (74.0) | Segment 3 (VP3): 1434 nt- partial<br>coding sequence        | None             | None             |
|                                                          | 2 | 35.5 | NC021543 | nt (67.2)<br>aa (71.7) | Segment 4 (VP4): 819 nt- partial<br>coding sequence         | None             | S (315)          |
|                                                          | 1 | 59.7 | NC021542 | nt (61.5)<br>aa (55.3) | Segment 9 (VP7): 486 nt- partial<br>coding sequence         | None             | H (35)           |
|                                                          | 1 | 58.3 | NC021550 | nt (66.0)<br>aa (69.2) | Segment 10 (NSP4): 438 nt- partial<br>coding sequence       | None             | None             |
| <b>Family Picobirnaviridae</b>                           |   |      |          |                        |                                                             |                  |                  |
| Dog<br>picobirnavirus<br>(Segment 2)-<br>Contig 1 (BSF1) | 1 | 94.4 | NC035206 | nt (62.9)<br>aa (66.3) | Segment 2 (RdRp): 1594 nt- near<br>complete coding sequence | E (178), A (531) | T (514), E (515) |
| Dog<br>picobirnavirus<br>(Segment 2)-<br>Contig 2 (BSF1) | 3 | 57.5 | NC035206 | nt (68.8)<br>aa (70.1) | Segment 2 (RdRp): 972 nt- partial<br>coding sequence        | L (98)           | None             |

|                                                                |   |      |          |                        |                                                             |                                                    |                                                |
|----------------------------------------------------------------|---|------|----------|------------------------|-------------------------------------------------------------|----------------------------------------------------|------------------------------------------------|
| Dog<br>picobirnavirus<br>(Segment 2)-<br>Contig 1 (BSF2)       | 1 | 97.2 | NC035206 | nt (67.1)<br>aa (68.8) | Segment 2 (RdRp): 1642 nt- complete<br>coding sequence      | GG (174), G (439)                                  | None                                           |
| Dog<br>picobirnavirus<br>(Segment 2)-<br>Contig 1 (BSF3)       | 2 | 75.7 | NC035206 | nt (67.8)<br>aa (69.8) | Segment 2 (RdRp): 1278 nt- partial<br>coding sequence       | KR (178)                                           | E (168), V (169), V (170), N<br>(171), E (385) |
| Chicken<br>picobirnavirus<br>(Segment 2)-<br>Contig 1 (BSF1)   | 1 | 85.4 | NC040439 | nt (57.4)<br>aa (57.8) | Segment 2 (RdRp): 1451 nt- partial<br>coding sequence       | MEF (169), KAIFL (317),<br>ELDRT (443), NAPR (515) | K (177), Q (511),                              |
| Chicken<br>picobirnavirus<br>(Segment 2)-<br>Contig 2 (BSF1)   | 2 | 32.8 | NC040439 | nt (69.6)<br>aa (72.3) | Segment 2 (RdRp): 557 nt- partial<br>coding sequence        | K (177), G (181)                                   | None                                           |
| Chicken<br>picobirnavirus<br>(Segment 2)-<br>Contig 1 (BSF2)   | 3 | 69.1 | NC040439 | nt (63.6)<br>aa (69.1) | Segment 2 (RdRp): 1175 nt- partial<br>coding sequence       | PTAS (162), DV (179)                               | None                                           |
| Chicken<br>picobirnavirus<br>(Segment 2)-<br>Contig 1 (BSF3)   | 1 | 73.5 | NC040439 | nt (60.8)<br>aa (63.8) | Segment 2 (RdRp): 1249 nt- partial<br>coding sequence       | NNGSSEAARI (171)                                   | Y (165)                                        |
| Chicken<br>picobirnavirus<br>(Segment 2)-<br>Contig 2 (BSF3)   | 1 | 63.6 | NC040439 | nt (66.9)<br>aa (71.3) | Segment 2 (RdRp): 1082 nt- partial<br>coding sequence       | HA (177), G (440)                                  | K (289), D (290)                               |
| Otarine<br>picobirnavirus<br>(Segment 2)-<br>(BSF2)            | 1 | 97.7 | NC034161 | nt (68.7)<br>aa (70.0) | Segment 2 (RdRp): 1650 nt- complete<br>coding sequence      | H (41)                                             | None                                           |
| Roe deer<br>picobirnavirus<br>(Segment 2)-<br>Contig 1- (BSF2) | 1 | 97.1 | NC040753 | nt (64.3)<br>aa (64.2) | Segment 2 (RdRp): 1671 nt- near<br>complete coding sequence | T (172)                                            | V (10), I (11), A (19), R (534)                |
| Roe deer<br>picobirnavirus                                     | 2 | 43.8 | NC040753 | nt (61.7)<br>aa (61.4) | Segment 2 (RdRp): 753 partial coding<br>sequence            | None                                               | V (10), I (11), K (21), D (335)                |

|                                                                |   |      |          |                        |                                                        |               |                                       |
|----------------------------------------------------------------|---|------|----------|------------------------|--------------------------------------------------------|---------------|---------------------------------------|
| (Segment 2)-<br>Contig 2- (BSF2)                               |   |      |          |                        |                                                        |               |                                       |
| Roe deer<br>picobirnavirus<br>(Segment 2)-<br>Contig 3- (BSF2) | 2 | 28.7 | NC040753 | nt (66.6)<br>aa (70.1) | Segment 2 (RdRp): 494 partial coding<br>sequence       | None          | None                                  |
| Roe deer<br>picobirnavirus<br>(Segment 2)-<br>Contig 1 (BSF3)  | 2 | 39.0 | NC040753 | nt (63.7)<br>aa (59.1) | Segment 2 (RdRp): 671 partial coding<br>sequence       | YYNYWTLD (18) | None                                  |
| Roe deer<br>picobirnavirus<br>(Segment 2)-<br>Contig 2- (BSF3) | 3 | 46.8 | NC040753 | nt (65.5)<br>aa (67.9) | Segment 2 (RdRp): 805 partial coding<br>sequence       | None          | None                                  |
| Porcine<br>picobirnavirus<br>(Segment S)-<br>Contig 1 (BSF2)   | 1 | 96.8 | NC029802 | nt (72.1)<br>aa (73.7) | Segment S (RdRp): 1675 nt- complete<br>coding sequence | Q (536)       | R (9), S (10), R (11), D (12),        |
| Porcine<br>picobirnavirus<br>(Segment S)-<br>Contig 2 (BSF2)   | 2 | 61.1 | NC029802 | nt (66.1)<br>aa (72.9) | Segment S (RdRp): 1057 nt- partial<br>coding sequence  | GNGAS (167)   | None                                  |
| Porcine<br>picobirnavirus<br>(Segment S)-<br>Contig 3 (BSF2)   | 3 | 38.3 | NC029802 | nt (68.7)<br>aa (76.7) | Segment S (RdRp): 748 nt- partial<br>coding sequence   | None          | None                                  |
| Porcine<br>picobirnavirus<br>(Segment S)-<br>Contig 1 (BSF3)   | 1 | 43.2 | NC029802 | nt (68.5)<br>aa (76.8) | Segment S (RdRp): 663 nt- partial<br>coding sequence   | None          | None                                  |
| Porcine<br>picobirnavirus<br>(Segment S)-<br>Contig 2 (BSF3)   | 1 | 40.3 | NC029802 | nt (70.8)<br>aa (76.0) | Segment S (RdRp): 697 nt- partial<br>coding sequence   | None          | None                                  |
| Green monkey<br>picobirnavirus<br>(BSF2)                       | 5 | 84.9 | NC034452 | nt (65.1)<br>aa (63.7) | RdRp: 1449 nt- partial coding<br>sequence              | None          | R (518), R (519), E (520), R<br>(538) |

|                                                            |   |      |          |                        |                                                       |                                                       |                                                       |
|------------------------------------------------------------|---|------|----------|------------------------|-------------------------------------------------------|-------------------------------------------------------|-------------------------------------------------------|
| Green monkey<br>picobirnavirus-<br>Contig 1 (BSF3)         | 2 | 63.9 | NC034452 | nt (66.4)<br>aa (65.1) | RdRp: 1091 nt- partial coding<br>sequence             | None                                                  | A (13), R (14), K (15), F (16)                        |
| Green monkey<br>picobirnavirus-<br>Contig 2 (BSF3)         | 2 | 61.5 | NC034452 | nt (65.0)<br>aa (64.2) | RdRp: 1050 nt- partial coding<br>sequence             | None                                                  | T (294), P (295), S (331)                             |
| Green monkey<br>picobirnavirus-<br>Contig 3 (BSF3)         | 2 | 32.2 | NC034452 | nt (65.6)<br>aa (63.6) | RdRp: 550 nt- partial coding sequence                 | None                                                  | None                                                  |
| Human<br>picobirnavirus<br>(Segment 2)-<br>(BSF2)          | 9 | 64.9 | NC007027 | nt (63.8)<br>aa (66.7) | Segment 2 (RdRp): 1133 nt- partial<br>coding sequence | None                                                  | None                                                  |
| Human<br>picobirnavirus<br>(Segment 2)-<br>Contig 1 (BSF3) | 1 | 79.9 | NC007027 | nt (56.9)<br>aa (57.3) | Segment 2 (RdRp): 1395 nt- partial<br>coding sequence | ETNKEKL (41),<br>DKRGVVAIQ (170), D (286),<br>A (314) | W (8), Y (146), I (158), P<br>(159), C (160), A (307) |
| Human<br>picobirnavirus<br>(Segment 2)-<br>Contig 2 (BSF3) | 2 | 68.7 | NC007027 | nt (67.1)<br>aa (69.2) | Segment 2 (RdRp): 1199 nt- partial<br>coding sequence | V (288)                                               | None                                                  |
| Human<br>picobirnavirus<br>(Segment 2)-<br>Contig 3 (BSF3) | 1 | 32.7 | NC007027 | nt (66.2)<br>aa (70.2) | Segment 2 (RdRp): 571 nt- partial<br>coding sequence  | T (292)                                               | None                                                  |
| <b>Family Picornaviridae</b>                               |   |      |          |                        |                                                       |                                                       |                                                       |
| Porcine<br>kobuvirus<br>(BSF1)                             | 6 | 25.8 | NC016769 | nt (89.7)<br>aa (96.3) | 2117 nt (partial coding sequence for<br>polyprotein)  | None                                                  | T (407), Q (408), D (409)                             |
| Porcine<br>kobuvirus<br>(BSF2)                             | 1 | 98.9 | NC011829 | nt (89.1)<br>aa (96.6) | 8123 nt (complete coding sequence for<br>polyprotein) | None                                                  | None                                                  |
| Porcine<br>kobuvirus<br>(BSF3)                             | 4 | 33.0 | NC011829 | nt (90.6)<br>aa (96.9) | 2706 nt (partial coding sequence for<br>polyprotein)  | None                                                  | None                                                  |
| Porcine<br>kobuvirus<br>(BSF3)                             | 6 | 54.8 | NC016769 | nt (88.0)<br>aa (94.5) | 4501 nt (partial coding sequence for<br>polyprotein)  | None                                                  | None                                                  |

[illegible]



|                                     |   |      |          |                        |                                                                                                              |                                              |                                                                                                    |
|-------------------------------------|---|------|----------|------------------------|--------------------------------------------------------------------------------------------------------------|----------------------------------------------|----------------------------------------------------------------------------------------------------|
| Posavirus 1 (BSF1)                  | 2 | 96.1 | NC023637 | nt (94.8)<br>aa (95.6) | 9453 nt (partial coding sequence for polyprotein)                                                            | None                                         | S (2610), S (2611), E (2612), K (2613), V (2614), N (2615), G (2616), N (2617), Y (2618), V (2619) |
| Posavirus 1 (BSF2)                  | 1 | 99.3 | NC023637 | nt (88.6)<br>aa (89.2) | 9789 nt (complete coding sequence for polyprotein)                                                           | G (2428)                                     | N (2906)                                                                                           |
| Posavirus 1 (BSF3)                  | 1 | 99.3 | NC023637 | nt (88.6)<br>aa (89.1) | 9782 nt (complete coding sequence for polyprotein)                                                           | G (2428)                                     | N (2906)                                                                                           |
| Posavirus 3 (BSF1)                  | 8 | 24.1 | NC028240 | nt (80.8)<br>aa (85.8) | 2138 nt (partial coding sequence for polyprotein)                                                            | None                                         | None                                                                                               |
| Posavirus 3 (BSF2)                  | 7 | 21.4 | NC028240 | nt (80.2)<br>aa (86.6) | 1906 nt (partial coding sequence for polyprotein)                                                            | None                                         | None                                                                                               |
| Posavirus 3 (BSF3)                  | 1 | 99.6 | NC028240 | nt (81.5)<br>aa (86.9) | 8845 nt (near complete coding sequence for polyprotein)                                                      | PD (178), M (1107)                           | S (155), P (156), A (157), S (158), E (159)                                                        |
| Picornavirales Bu-1 (BSF2)          | 3 | 96.2 | NC030745 | nt (87.2)<br>aa (89.9) | 8877 nt (partial coding sequence for polyprotein)                                                            | H (1160), T (2577)                           | Q (91)                                                                                             |
| Picornavirales Bu-1 (BSF3)          | 3 | 48.8 | NC030745 | nt (87.4)<br>aa (90.6) | 4499 nt (partial coding sequence for polyprotein)                                                            | N (1160)                                     | None                                                                                               |
| Picornavirales Tottori-HG1 (BSF3)   | 1 | 99.2 | NC030744 | nt (92.0)<br>aa (95.6) | 9787 nt (complete coding sequence for polyprotein)                                                           | None                                         | None                                                                                               |
| <b>Family Caliciviridae</b>         |   |      |          |                        |                                                                                                              |                                              |                                                                                                    |
| Porcine enteric sapovirus (BSF2)    | 1 | 99.5 | NC000940 | nt (76.8)<br>aa (85.0) | 7290 nt (near complete coding sequence for polyprotein and complete coding sequence for small basic protein) | <b>Polyprotein:</b> PN (30), R (50)          | <b>Polyprotein:</b> L (41)                                                                         |
| <b>Family Phenuiviridae</b>         |   |      |          |                        |                                                                                                              |                                              |                                                                                                    |
| Dipteran hudivirus (Segment 3)-BSF1 | 2 | 47.9 | NC032279 | nt (70.4)<br>aa (73.1) | 592 nt (partial coding sequence for putative nucleoprotein)                                                  | None                                         | None                                                                                               |
| Rice stripe tenuivirus (BSF3)       | 2 | 32.9 | NC003753 | nt (73.6)<br>aa (83.5) | 709 nt (partial coding sequence)                                                                             | None                                         | None                                                                                               |
| <b>Family Dicistroviridae</b>       |   |      |          |                        |                                                                                                              |                                              |                                                                                                    |
| Goose dicistrovirus (BSF2)          | 9 | 39.8 | NC029052 | nt (83.9)<br>aa (87.5) | 3636 nt (partial coding sequences for nonstructural polyprotein and capsid protein precursor)                | <b>Capsid protein precursor:</b> SSSVK (520) | <b>Capsid protein precursor:</b> T (535), A (536)                                                  |



|                                    |    |      |          |                        |                                   |                                             |                                                                                       |
|------------------------------------|----|------|----------|------------------------|-----------------------------------|---------------------------------------------|---------------------------------------------------------------------------------------|
| Beihai tombus-like virus 15 (BSF2) | 3  | 40.9 | NC033202 | nt (58.1)<br>aa (54.5) | 1361 nt (partial coding sequence) | <b>Hypothetical protein 1: LSQ</b><br>(538) | <b>Hypothetical protein 1: N</b><br>(525), D (526), E (531)                           |
| Thika virus (BSF2)                 | 8  | 39.6 | NC027127 | nt (65.8)<br>aa (67.2) | 3603 nt (partial coding sequence) | L (2119)                                    | P (2090), G (2091)                                                                    |
| Hubei picorna-like virus 15 (BSF2) | 11 | 39.6 | NC032757 | nt (90.2)<br>aa (94.2) | 3926 nt (partial coding sequence) | None                                        | None                                                                                  |
| Hubei tombus-like virus 17 (BSF3)  | 3  | 49.9 | NC032813 | nt (63.4)<br>aa (61.6) | 1854 nt (partial coding sequence) | None                                        | <b>Hypothetical protein 2: T</b><br>(98)<br><b>Hypothetical protein 3: Q</b><br>(233) |
| Wuhan insect virus 23 (BSF3)       | 1  | 26.2 | NC032146 | nt (69.5)<br>aa (73.6) | 387 nt (partial coding sequence)  | None                                        | None                                                                                  |

BSF = Backyard swine farm; nt = nucleotides; aa = amino acids.
